# Supplementary material for: Amygdala-orbitofrontal structural and functional connectivity in females with anxiety disorders, with and without a history of conduct disorder
Source: PubMed Central journal article supplement (PMC5773614; doi:10.1038/s41598-018-19569-7), 2018-01-18
Supplement: 41598_2018_19569_MOESM1_ESM.pdf [file 41598_2018_19569_MOESM1_ESM.pdf]

**Supplementary material for:**

Amygdala-orbitofrontal structural and functional connectivity in females with anxiety disorders, with and without a history of conduct disorder

Philip Lindner<sup>1,2,3\*</sup>

Pär Flodin<sup>4,5</sup>

Peter Larm<sup>6</sup>

Meenal Budhiraja<sup>1</sup>

Ivanka Savic-Berglund<sup>7,8</sup>

Jussi Jokinen<sup>1,9</sup>

Jari Tiihonen<sup>1,10</sup>

Sheilagh Hodgins<sup>1,11</sup>

<sup>1</sup>Department of Clinical Neuroscience, Karolinska Institutet, Stockholm, Sweden

<sup>2</sup>Stockholm Center for Dependence Disorders, Stockholm County Council, Stockholm, Sweden

<sup>3</sup>Department of Psychology, Stockholm University, Stockholm, Sweden

<sup>4</sup>Umeå Center for Functional Brain Imaging, Umeå University, Umeå, Sweden

<sup>5</sup>Center for Aging and Demographic Research, Umeå University, Umeå, Sweden

<sup>6</sup>Centre for Clinical Research, Uppsala University, Sweden

<sup>7</sup>Department of Women's and Children's Health, Karolinska Institutet, Stockholm, Sweden

<sup>8</sup>Neurology Clinic, Karolinska University Hospital, Huddinge, Sweden

<sup>9</sup>Department of Clinical Sciences, Umeå University, Umeå, Sweden

<sup>10</sup>Department of Forensic Psychiatry, University of Eastern Finland, Niuvanniemi Hospital,  
Kuopio, Finland

<sup>11</sup>Département de Psychiatrie, Université de Montréal, Montréal, QC, Canada

**\*Corresponding author:**

Philip Lindner

Frescati Hagväg 8, 114 19, Stockholm, Sweden

[philip.lindner@psychology.su.se](mailto:philip.lindner@psychology.su.se)

+46 70 452 25 87

**Supplementary Table S1. Frequency of anxiety disorders**

| Disorder                                 | AD-only group<br>(n=30) |         | AD+CD group (n=23) |         | Fisher exact statistic |         |
|------------------------------------------|-------------------------|---------|--------------------|---------|------------------------|---------|
|                                          | Lifetime                | Current | Lifetime           | Current | Lifetime               | Current |
| Agoraphobia                              | 3%                      | 0%      | 9%                 | 4%      | p=.57                  | p=.43   |
| Generalized anxiety disorder             | 7%                      | 7%      | 9%                 | 9%      | p=1                    | p=1     |
| Obsessive compulsive disorder            | 10%                     | 0%      | 26%                | 9%      | p=.15                  | p=.18   |
| Panic disorder                           | 33%                     | 3%      | 43%                | 13%     | p=.57                  | p=.31   |
| Post-traumatic stress disorder           | 17%                     | 3%      | 26%                | 0%      | p=.5                   | p=1     |
| Social anxiety disorder                  | 50%                     | 3%      | 35%                | 9%      | p=.4                   | p=.57   |
| Specific phobia                          | 33%                     | 7%      | 61%                | 22%     | p=.06                  | p=.22   |
| Substance-induced anxiety disorder       | 7%                      | 0%      | 4%                 | 0%      | p=1                    | NA      |
| Anxiety disorder not otherwise specified | 20%                     | 0%      | 26%                | 4%      | p=.74                  | p=.43   |
| Anxiety disorder due to somatic illness  | 0%                      | 0%      | 0%                 | 0%      | NA                     | NA      |
| More than one anxiety disorder           | 43%                     | 0%      | 65%                | 9%      | p=.17                  | p=.18   |

|                                   |     |    |     |    |       |       |
|-----------------------------------|-----|----|-----|----|-------|-------|
| More than two anxiety disorders   | 27% | 0% | 35% | 9% | p=.56 | p=.18 |
| More than three anxiety disorders | 7%  | 0% | 26% | 9% | p=.06 | p=.18 |
